# Supplementary material for: Phylosymbiosis in the Rhizosphere Microbiome Extends to Nitrogen Cycle Functional Potential
Source: MDPI journal article supplement (doi:10.3390/microorganisms9122476), 2021-11-30
Supplement: s1 [file s1]

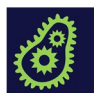

## Supplementary Materials

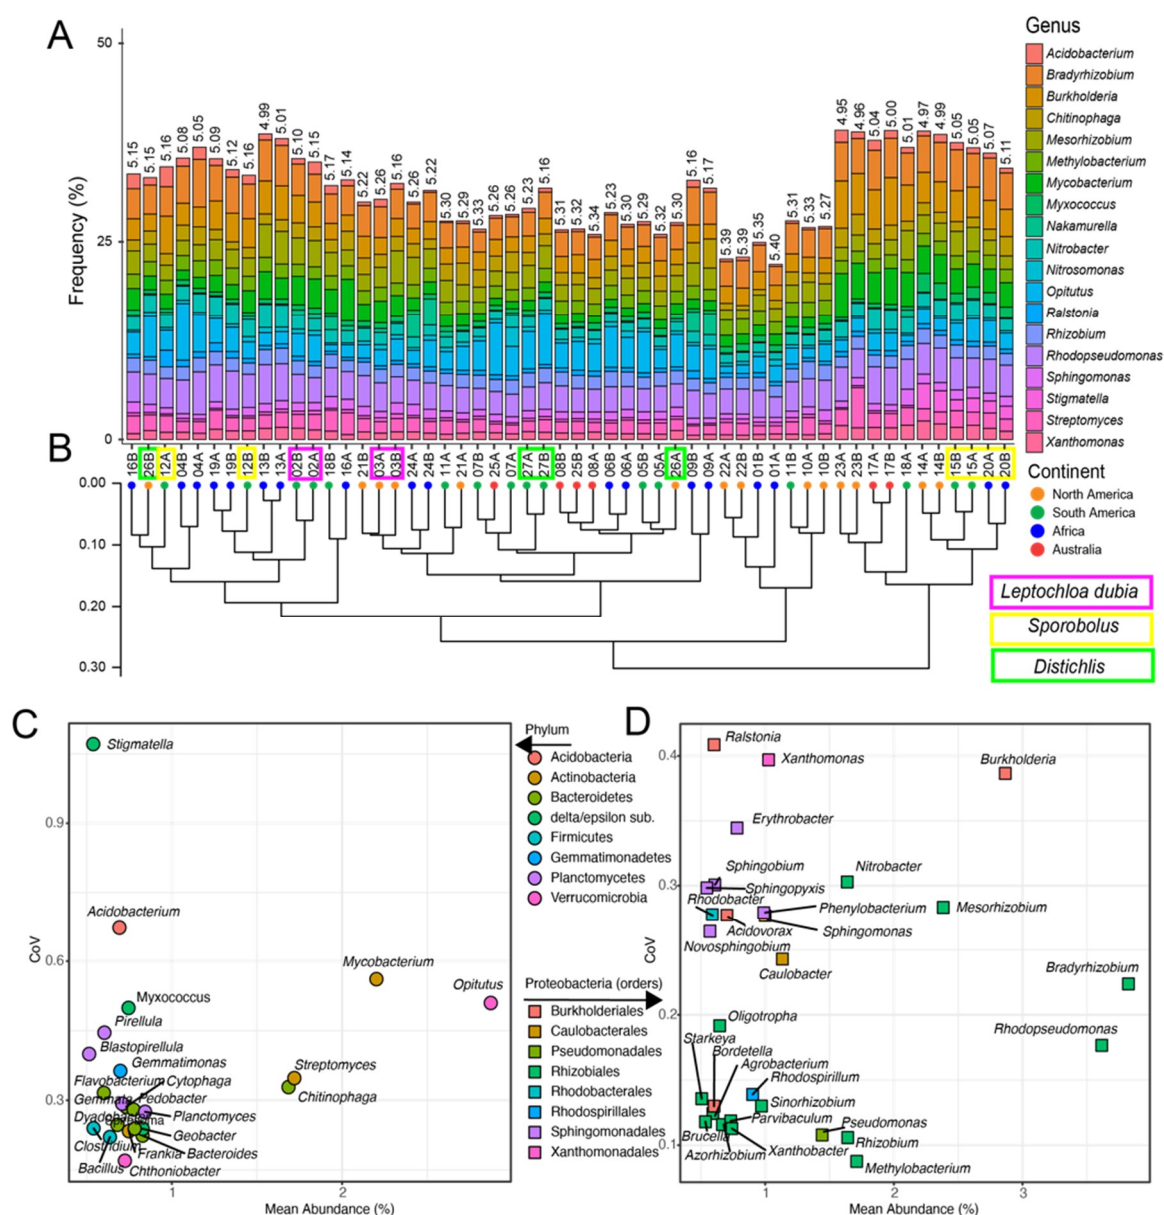

**Figure S1.** (A) Bar plot highlighting the most abundant genera (i.e., >2%) identified across samples. The displayed (on top of bars) Shannon diversity index ( $H'$ ) was computed using all the taxonomically identified reads (at the genus level) for each sample, after rarefaction. (B) Microbiome clustering using all of the taxonomically annotated reads (at the genus level), using Bray-Curtis dissimilarity index and single linkage. Sample IDs (e.g., 01A) refer to the plant species (see Figure 1B, Table S1) and the sample replicate (A or B). (C, D) Coefficient of variation (CoV) of the most abundant lineages (i.e., >0.5% of the annotated reads) across samples. (C) The most abundant genera colored by phylum (without Proteobacteria). (D) The most abundant Proteobacteria colored by order.

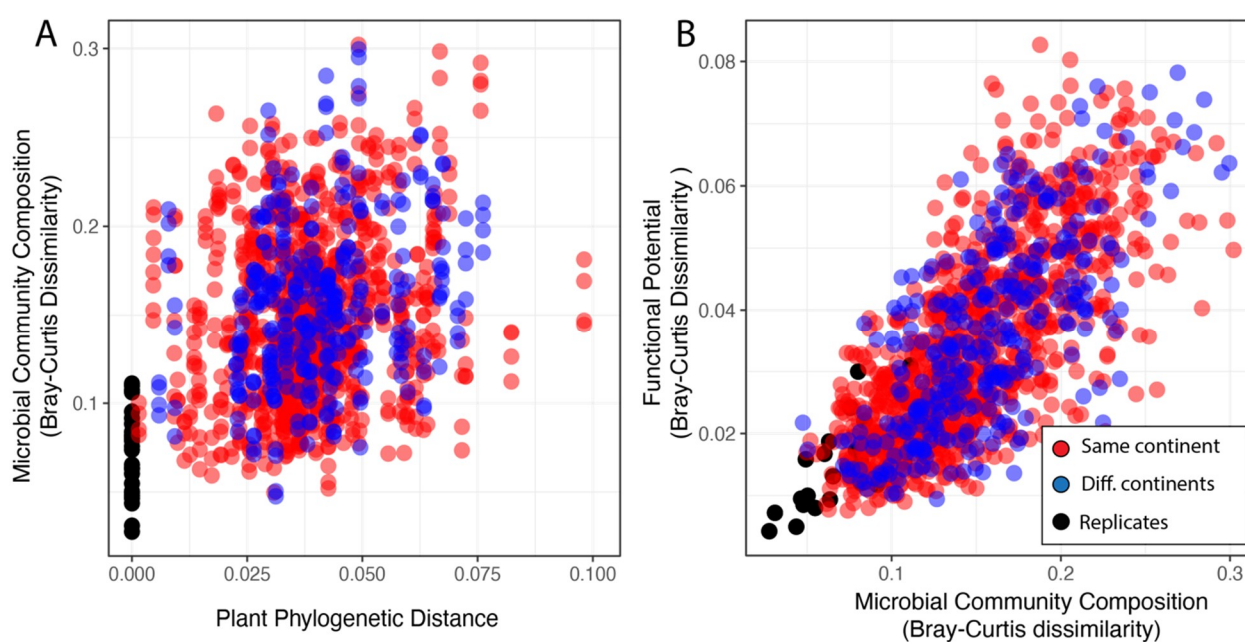

**Figure S2.** (A) Relation between phylogenetic distance among pairs of plants and the microbial community dissimilarity and (B) variation in the functional potential for N-cycling in the corresponding microbial communities. Comparison between technical replicates (same plant, black circle), and between samples from the same or distinct continent are highlighted.

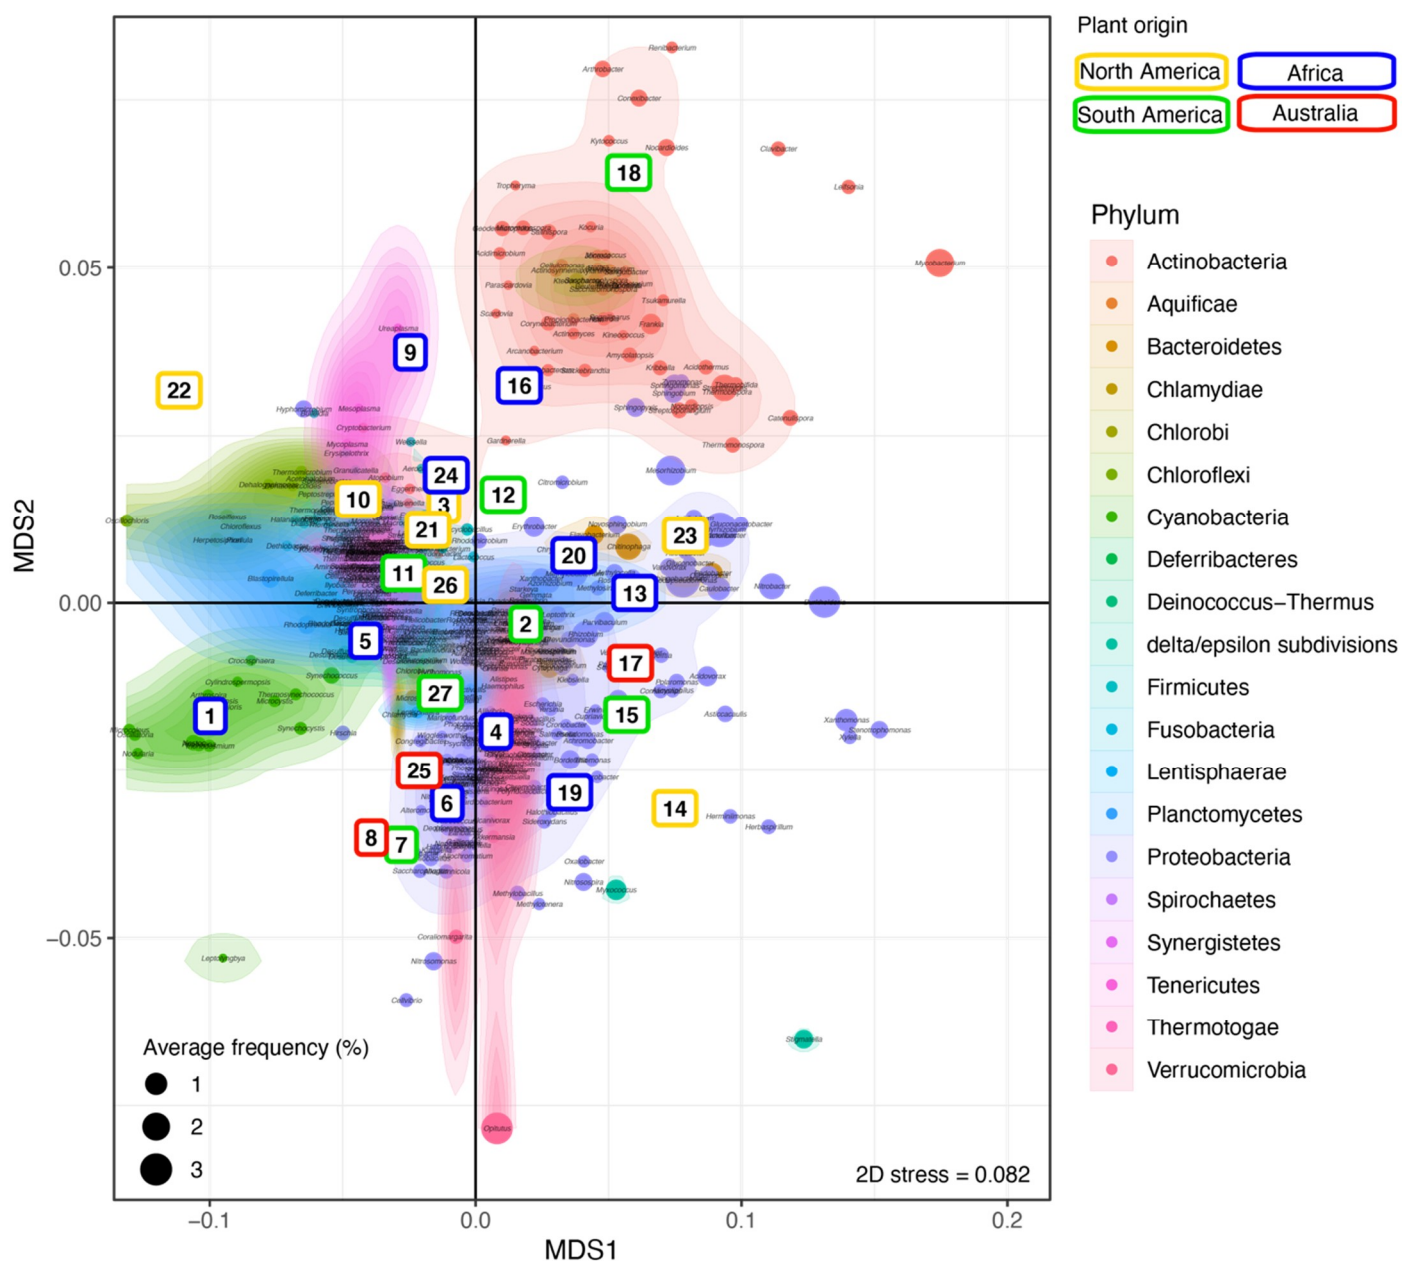

**Figure S3.** High resolution NMDS with all the bacterial genera identified. Microbial community structure across plants. NMDS ordination of the grass samples (colored by continent) according to their microbial community composition. The identified bacterial genera are colored by phylum and overlaid with a 2D-Kernel density plot to highlights the phyla. The genera most affected by the plant phylogeny are labeled.

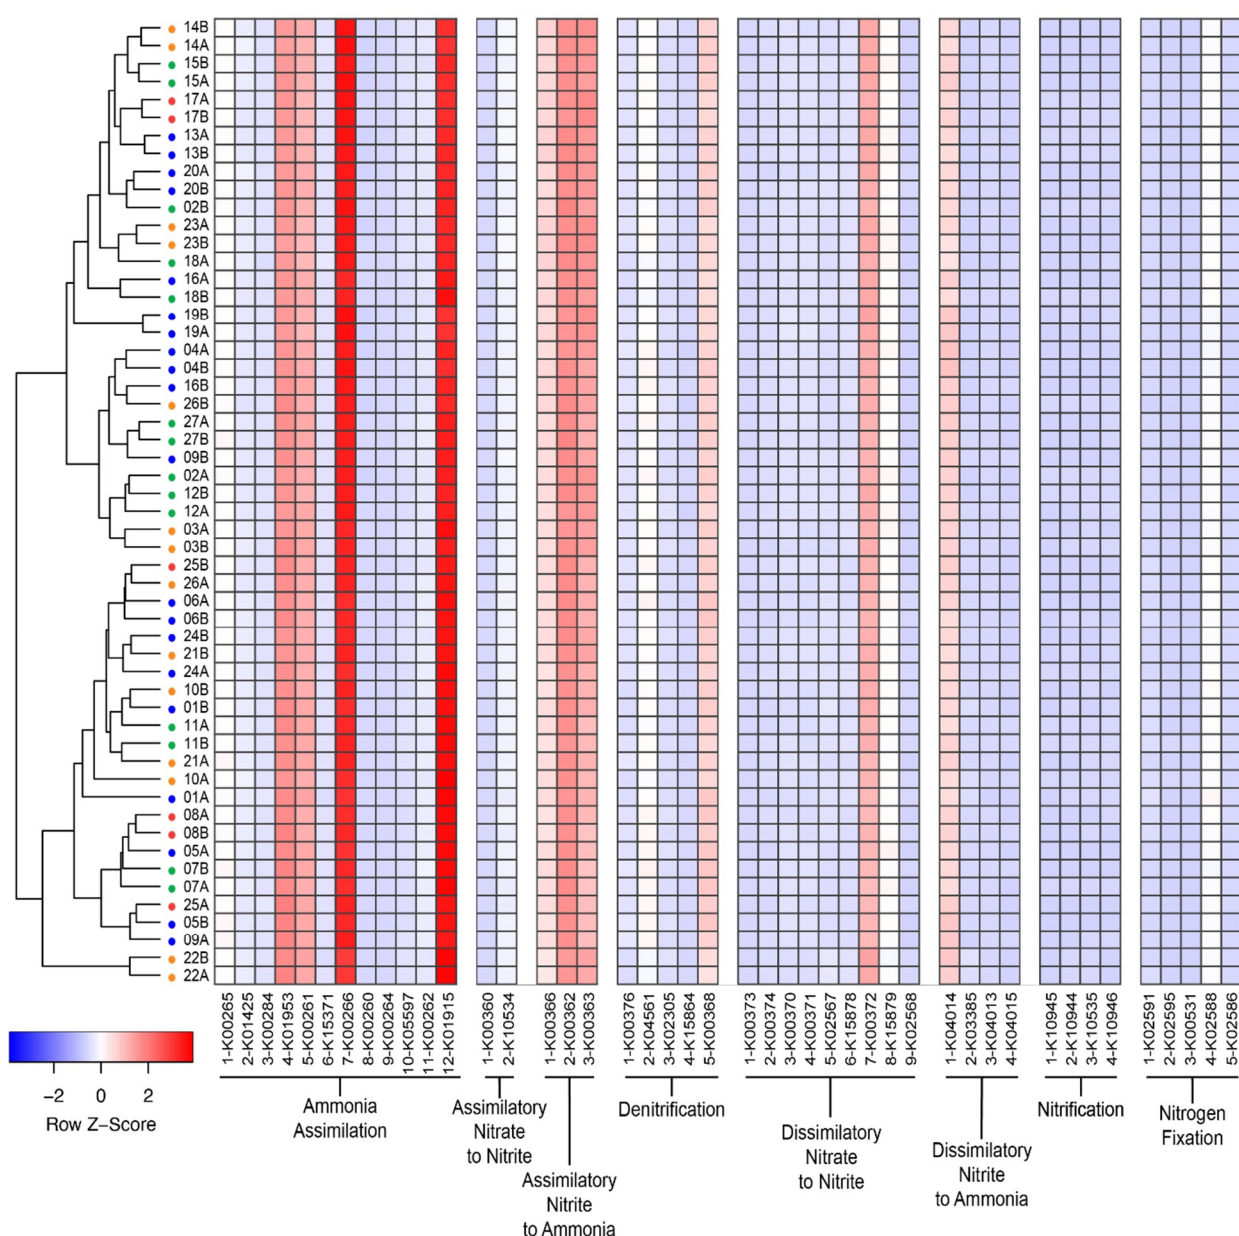

**Figure S4.** Functional potential for N-cycling pathways across sequenced microbiomes. The microbiomes are identified by the plant number (see Figure 1, Table S1) and replicate (A or B, see Table S2). The traits involved in N-cycling are grouped by pathways and are identified by the reaction number and KO id (see Table S3). The Z-score normalization is by row to highlight variation in N-cycling traits within samples (see Figure 4 for Z-score normalization by column to highlight variation in N-cycling traits across samples). The clustering is based on Bray-Curtis dissimilarity index and single linkage.



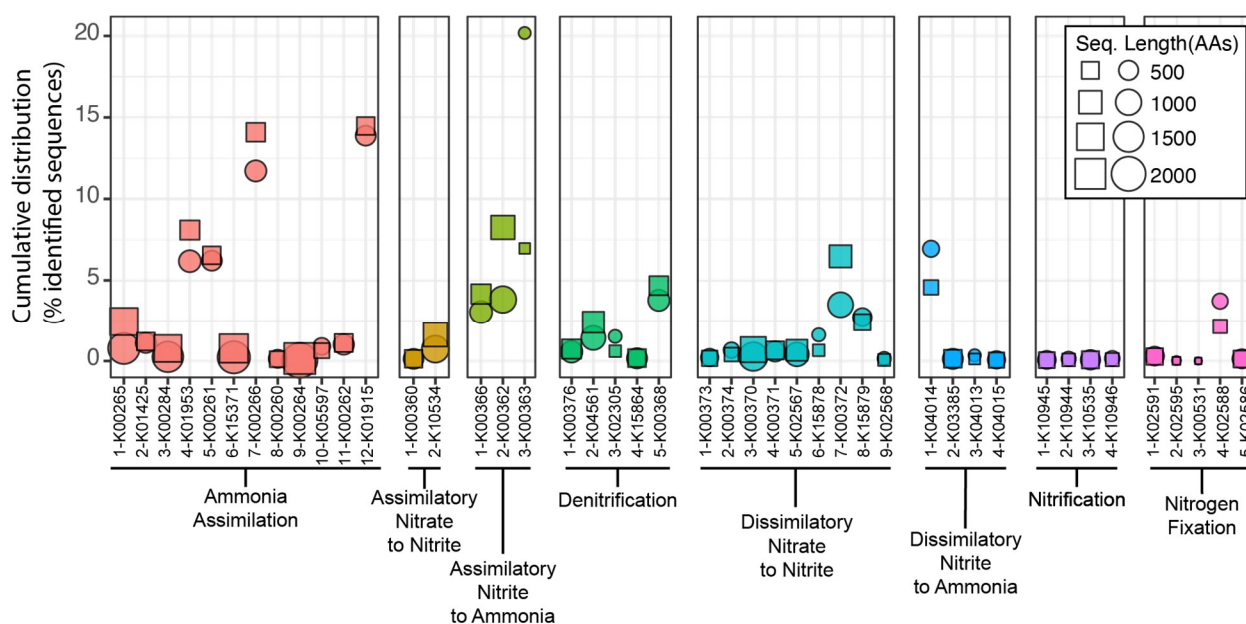

**Figure S5.** Cumulative distribution (%) of sequences for the N-cycling identified in the sequenced microbiomes before (□) and after (○) accounting for the length of the targeted sequence.

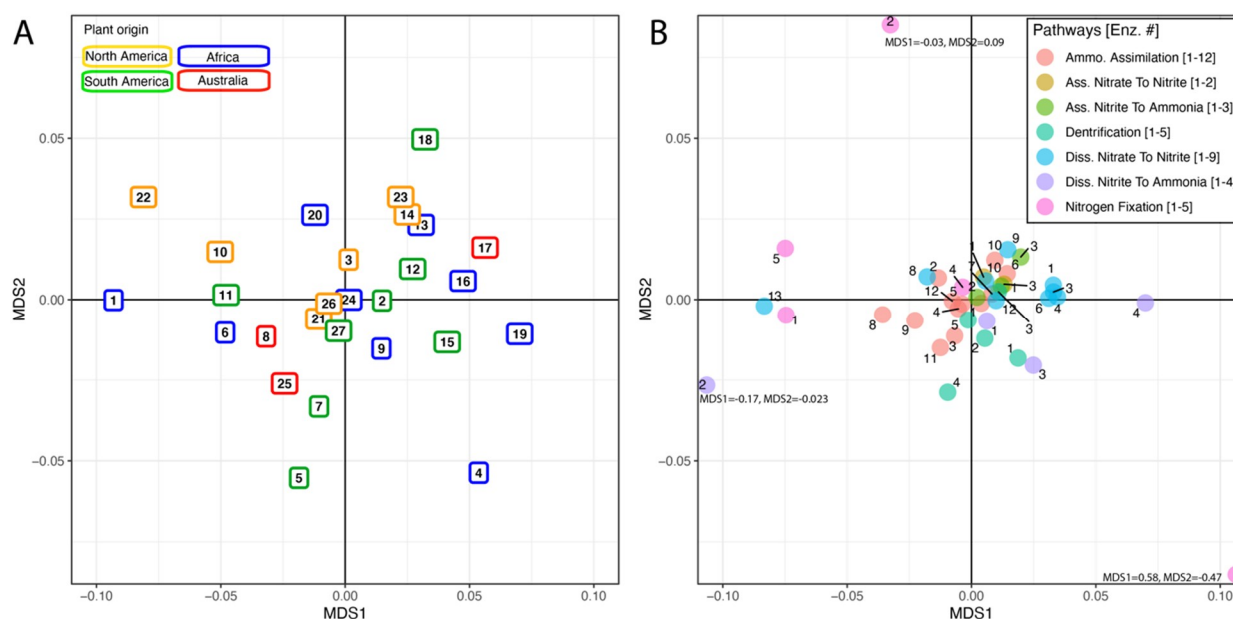

**Figure S6.** (A) NMDS ordination (2D stress=0.11) of the grass samples, after replicates were combined, according to (B) the rarefied distribution of reads supporting the N-cycling reactions (see Table S3).

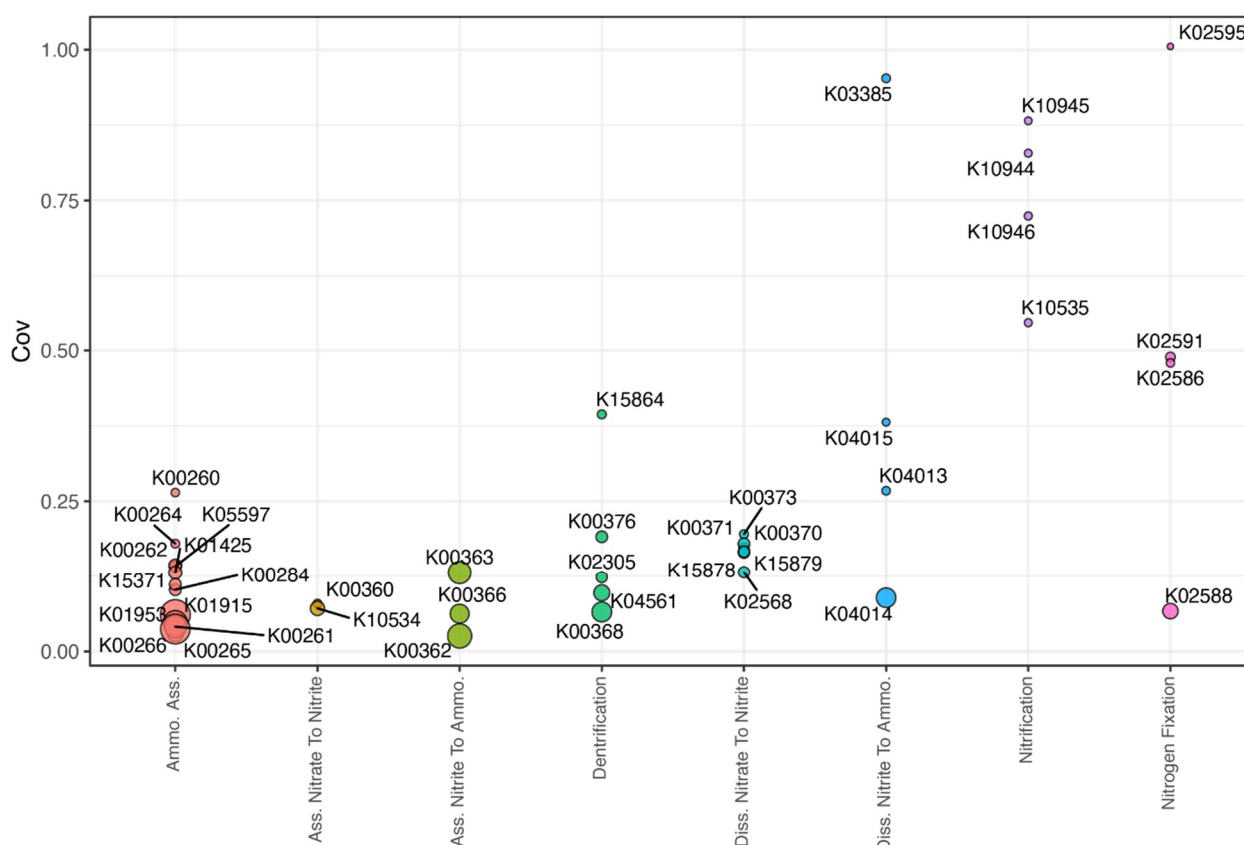

**Figure S7.** Coefficient of variation (CoV) of the traits supporting the N-cycling (see Table S3) across samples. Size corresponds to the relative average frequency of the trait across samples (see Figure 4A). CoV of *anfG* (K00531) for N-fixation pathway is not displayed.

**Table S1.** Grass Species Sampled with voucher specimen, Sample Origin, and GenBank Accession Numbers. P is a plasmid accession number. Individual Sanger sequence accession numbers are listed in order as the *ndhF* gene, *trnC-rpoB* intergenic spacer, and *trnL-F* intergenic spacer. Plant number is used in figures. Voucher specimen indicates the collector and collection number. All vouchers are deposited at California Botanic Garden (RSA).

| Plant # | Species                                | Voucher Specimen | Sample Origin                    | GenBank Accession Number   |
|---------|----------------------------------------|------------------|----------------------------------|----------------------------|
| 1       | <i>Centropodia mossamadensis</i>       | Columbus 5680    | Namibia, Kunene Region           | MW013430,MW013444,MW013458 |
| 2       | <i>Leptochloa dubia</i>                | Columbus 3155    | Argentina, Prov. Catamarca       | MW013433,MW013439,MW013453 |
| 3       | <i>Leptochloa dubia</i>                | Columbus 2456    | USA, Arizona                     | P:MW014303                 |
| 4       | <i>Danthoniopsis ramosa</i> (outgroup) | Columbus 5621    | Namibia, Khomas Region           | P:MW014307                 |
| 5*      | <i>Odyssea paucinervis</i>             | Columbus 5582    | South Africa, Western Cape Prov. | P:MW014308                 |
| 6       | <i>Perotis hildebrandtii</i>           | Columbus 5739    | Tanzania, Pwani Region           | P:MW014309                 |
| 7       | <i>Neobouteloua lophostachya</i>       | Columbus 3149    | Argentina, Prov. Catamarca       | MW013434,MW013446,MW013459 |
| 8       | <i>Uniolinae</i> sp.                   | Simon 4500       | Australia, Queensland            | P:MW014312                 |
| 9       | <i>Ctenium</i> cf. <i>concinnum</i>    | Columbus 5789    | Tanzania, Iringa Region          | P:MW014301                 |
| 10      | <i>Hilaria cenchroides</i>             | Columbus 2295    | Mexico, Sonora                   | P:KT168387                 |
| 11      | <i>Tridens brasiliensis</i>            | Columbus 4816    | Argentina, Prov. Corrientes      | P:MW014311                 |
| 12      | <i>Sporobolus maximus</i>              | Columbus 3182    | Argentina, Prov. Tucumán         | P:MW014304                 |
| 13      | <i>Tetrachne dregei</i>                | Columbus 5491    | South Africa, Eastern Cape Prov. | P:MW014310                 |
| 14      | <i>Pappophorum vaginatum</i>           | Columbus 2540    | USA, Arizona                     | MW013435,MW013447,MW013450 |
| 15      | <i>Sporobolus spartinus</i>            | Columbus 3072    | Argentina, Prov. Santa Fe        | MW013436,MW013448,MW013451 |
| 16      | <i>Triraphis andropogonoides</i>       | Columbus 5579    | South Africa, Eastern Cape Prov. | x,MW013442,MW013456        |
| 17      | <i>Austrochloris dicanthioides</i>     | Columbus 5265    | Australia, Queensland            | MW013429,MW013441,MW013455 |
| 18      | <i>Eustachys distichophylla</i>        | Columbus 3090    | Argentina, Prov. Córdoba         | MW013431,MW13445,MW013452  |
| 19      | <i>Fingerhuthia sesleriformis</i>      | Cerros 2804      | South Africa, Western Cape Prov. | MW013432,MW013438,MW013449 |
| 20      | <i>Sporobolus oxyphyllus</i>           | Columbus 5604    | South Africa, North West Prov.   | MW013437,MW013443,MW013457 |

|    |                                 |               |                             |                     |
|----|---------------------------------|---------------|-----------------------------|---------------------|
| 21 | <i>Muhlenbergia brevigluma</i>  | Columbus 4772 | Mexico, Baja California Sur | x,MW013440,MW013454 |
| 22 | <i>Eragrostis elongata</i>      | Columbus 3991 | USA, Hawaii, Kauai          | P:MW014306          |
| 23 | <i>Bouteloua gracilis</i>       | Columbus 3223 | USA, Wyoming                | P:KT168392          |
| 24 | <i>Trichoneura grandiglumis</i> | Columbus 5617 | Namibia, Khomas Region      | P:MW014302          |
| 25 | <i>Astrebla pectinata</i>       | Columbus 5147 | Australia, Queensland       | P:KT168391          |
| 26 | <i>Distichlis littoralis</i>    | Bell 544      | USA, Texas                  | P:MW014305          |
| 27 | <i>Distichlis spicata</i>       | Bell 511      | Argentina, Prov. Santa Cruz | P:KT168395          |

Table S2. Metagenomes used in this study.

| Plant #<br>(table S1) | Replicate | Plant species<br>(see table S1)    | Metagenome ID | # Sequences before QC | # Sequences after QC |
|-----------------------|-----------|------------------------------------|---------------|-----------------------|----------------------|
| 1                     | A         | <i>Centropodia mossamadensis</i>   | mgm4767455    | 28,700,675            | 24,085,890           |
| 1                     | B         |                                    | mgm4851174    | 20,887,001            | 17,768,434           |
| 2                     | A         | <i>Leptochloa dubia</i>            | mgm4767419    | 27,265,005            | 23,506,585           |
| 2                     | B         |                                    | mgm4767523    | 29,765,081            | 27,066,043           |
| 3                     | A         | <i>Leptochloa dubia</i>            | mgm4767442    | 28,013,016            | 23,893,164           |
| 3                     | B         |                                    | mgm4767422    | 28,745,304            | 25,032,480           |
| 4                     | A         | <i>Danthoniopsis ramosa</i>        | mgm4767491    | 24,725,433            | 21,358,903           |
| 4                     | B         |                                    | mgm4767494    | 29,299,148            | 25,280,794           |
| 5                     | A         | <i>Odysea paucinervis</i>          | mgm4767456    | 25,077,269            | 21,744,029           |
| 5                     | B         |                                    | mgm4767462    | 21,631,825            | 18,681,843           |
| 6                     | A         | <i>Perotis hildebrandtii</i>       | mgm4767467    | 26,767,811            | 23,096,788           |
| 6                     | B         |                                    | mgm4767472    | 25,933,673            | 22,204,118           |
| 7                     | A         | <i>Neobouteloua lophostachya</i>   | mgm4767469    | 25,278,828            | 21,421,336           |
| 7                     | B         |                                    | mgm4767492    | 22,609,724            | 19,607,886           |
| 8                     | A         | <i>Uniolinae sp.</i>               | mgm4767428    | 32,093,965            | 26,512,876           |
| 8                     | B         |                                    | mgm4851173    | 29,111,900            | 25,733,484           |
| 9                     | A         | <i>Ctenium cf. concinnum</i>       | mgm4767452    | 29,881,370            | 25,404,466           |
| 9                     | B         |                                    | mgm4767468    | 29,416,604            | 25,580,325           |
| 10                    | A         | <i>Hilaria cenchroides</i>         | mgm4767418    | 32,733,043            | 28,054,735           |
| 10                    | B         |                                    | mgm4767430    | 30,893,383            | 25,413,240           |
| 11                    | A         | <i>Tridens brasiliensis</i>        | mgm4767485    | 27,600,940            | 23,672,437           |
| 11                    | B         |                                    | mgm4767426    | 29,107,096            | 24,070,560           |
| 12                    | A         | <i>Sporobolus maximus</i>          | mgm4767448    | 32,531,358            | 28,009,579           |
| 12                    | B         |                                    | mgm4767440    | 25,105,953            | 21,229,061           |
| 13                    | A         | <i>Tetrachne dregei</i>            | mgm4767497    | 27,203,650            | 23,840,872           |
| 13                    | B         |                                    | mgm4767498    | 22,543,243            | 18,598,257           |
| 14                    | A         | <i>Pappophorum vaginatum</i>       | mgm4767471    | 26,265,997            | 23,133,148           |
| 14                    | B         |                                    | mgm4767435    | 26,843,986            | 22,195,389           |
| 15                    | A         | <i>Sporobolus spartinus</i>        | mgm4767434    | 29,418,551            | 25,804,761           |
| 15                    | B         |                                    | mgm4767450    | 29,471,977            | 23,964,915           |
| 16                    | A         | <i>Triraphis andropogonoides</i>   | mgm4767465    | 22,498,716            | 19,630,812           |
| 16                    | B         |                                    | mgm4767487    | 30,875,604            | 25,296,555           |
| 17                    | A         | <i>Austrochloris dicanthioides</i> | mgm4767510    | 23,193,679            | 20,521,490           |
| 17                    | B         |                                    | mgm4767509    | 26,831,301            | 22,259,797           |
| 18                    | A         | <i>Eustachys distichophylla</i>    | mgm4767499    | 26,080,918            | 23,056,181           |
| 18                    | B         |                                    | mgm4767484    | 27,416,310            | 22,867,877           |
| 19                    | A         | <i>Fingerhuthia sesleriformis</i>  | mgm4767477    | 22,484,411            | 19,684,461           |
| 19                    | B         |                                    | mgm4767439    | 32,840,703            | 26,928,931           |
| 20                    | A         | <i>Sporobolus oxyphyllus</i>       | mgm4767507    | 31,906,851            | 27,869,950           |
| 20                    | B         |                                    | mgm4767437    | 28,289,510            | 23,398,957           |
| 21                    | A         | <i>Muhlenbergia brevigluma</i>     | mgm4767483    | 26,534,187            | 23,310,600           |
| 21                    | B         |                                    | mgm4767454    | 26,837,199            | 22,426,996           |
| 22                    | A         | <i>Eragrostis elongata</i>         | mgm4767520    | 27,378,506            | 25,427,012           |

|                |            |                                 |            |                      |                      |
|----------------|------------|---------------------------------|------------|----------------------|----------------------|
| 22             | B          |                                 | mgm4767473 | 31,071,070           | 26,108,738           |
| 23             | A          | <i>Bouteloua gracilis</i>       | mgm4767479 | 22,668,599           | 20,029,724           |
| 23             | B          |                                 | mgm4767417 | 31,037,485           | 26,778,054           |
| 24             | A          | <i>Trichoneura grandiglumis</i> | mgm4767451 | 22,271,002           | 19,499,088           |
| 24             | B          |                                 | mgm4767421 | 27,809,461           | 24,289,836           |
| 25             | A          | <i>Astrebla pectinata</i>       | mgm4767490 | 27,878,526           | 23,761,008           |
| 25             | B          |                                 | mgm4767518 | 28,872,869           | 25,931,234           |
| 26             | A          | <i>Distichlis littoralis</i>    | mgm4767500 | 25,667,666           | 22,495,247           |
| 26             | B          |                                 | mgm4767475 | 31,238,182           | 26,638,704           |
| 27             | A          | <i>Distichlis spicata</i>       | mgm4767493 | 27,263,164           | 23,805,480           |
| 27             | B          |                                 | mgm4767425 | 33,707,351           | 28,341,655           |
| <b>Total</b>   | <b>N/A</b> | <b>N/A</b>                      | <b>N/A</b> | <b>1,487,576,079</b> | <b>1,276,324,785</b> |
| <b>Average</b> | <b>N/A</b> | <b>N/A</b>                      | <b>N/A</b> | <b>27,547,705</b>    | <b>23,635,644</b>    |
| <b>SD</b>      | <b>N/A</b> | <b>N/A</b>                      | <b>N/A</b> | <b>3,196,158</b>     | <b>2,651,793</b>     |

Table S3. Reaction for N-cycling pathways identified in this study.

| Pathway                          | React. # <sup>a</sup> | KO id  | Domain length (AA) | Function                                                                        |
|----------------------------------|-----------------------|--------|--------------------|---------------------------------------------------------------------------------|
| Ammonia Assimilation             | 1                     | K00265 | 1601               | Glutamate synthase (NADPH) large chain [EC:1.4.1.13]                            |
|                                  | 2                     | K01425 | 546                | Glutaminase [EC:3.5.1.2]                                                        |
|                                  | 3                     | K00284 | 1527               | Glutamate synthase (ferredoxin) [EC:1.4.7.1]                                    |
|                                  | 4                     | K01953 | 664                | Asparagine synthase (glutamine-hydrolysing) [EC:6.3.5.4]                        |
|                                  | 5                     | K00261 | 534                | Glutamate dehydrogenase (NAD(P)+) [EC:1.4.1.3]                                  |
|                                  | 6                     | K15371 | 1730               | Glutamate dehydrogenase [EC:1.4.1.2]                                            |
|                                  | 7                     | K00266 | 610                | Glutamate synthase (NADPH) small chain [EC:1.4.1.13]                            |
|                                  | 8                     | K00260 | 416                | Glutamate dehydrogenase [EC:1.4.1.2]                                            |
|                                  | 9                     | K00264 | 2121               | Glutamate synthase (NADH) [EC:1.4.1.14]                                         |
|                                  | 10                    | K05597 | 359                | Glutamin-(asparagin)-ase [EC:3.5.1.38]                                          |
|                                  | 11                    | K00262 | 556                | Glutamate dehydrogenase (NADP+) [EC:1.4.1.4]                                    |
|                                  | 12                    | K01915 | 529                | Glutamine synthetase [EC:6.3.1.2]                                               |
| Assimilatory Nitrate To Nitrite  | 1                     | K00360 | 529                | Assimilatory nitrate reductase electron transfer subunit [EC:1.7.99.-]          |
|                                  | 2                     | K10534 | 1126               | Nitrate reductase (NAD(P)H) [EC:1.7.1.1 1.7.1.2 1.7.1.3]                        |
| Assimilatory Nitrite To Ammonia  | 1                     | K00366 | 694                | Ferredoxin-nitrite reductase [EC:1.7.7.1]                                       |
|                                  | 2                     | K00362 | 1096               | Nitrite reductase (NADH) large subunit [EC:1.7.1.15]                            |
|                                  | 3                     | K00363 | 175                | Nitrite reductase (NADH) small subunit [EC:1.7.1.15]                            |
| Dentrification                   | 1                     | K00376 | 655                | Nitrous-oxide reductase [EC:1.7.2.4]                                            |
|                                  | 2                     | K04561 | 857                | Nitric oxide reductase subunit B [EC:1.7.2.5]                                   |
|                                  | 3                     | K02305 | 203                | Nitric oxide reductase subunit C                                                |
|                                  | 4                     | K15864 | 551                | Nitrite reductase (NO-forming) / hydroxylamine reductase [EC:1.7.2.1 1.7.99.1]  |
|                                  | 5                     | K00368 | 629                | Nitrite reductase (NO-forming) [EC:1.7.2.1]                                     |
| Dissimilatory Nitrate To Nitrite | 1                     | K00373 | 384                | Nitrate reductase molybdenum cofactor assembly chaperone NarJ/NarW              |
|                                  | 2                     | K00374 | 302                | Nitrate reductase gamma subunit [EC:1.7.5.1 1.7.99.-]                           |
|                                  | 3                     | K00370 | 1301               | Nitrate reductase / nitrite oxidoreductase, alpha subunit [EC:1.7.5.1 1.7.99.-] |
|                                  | 4                     | K00371 | 560                | Nitrate reductase / nitrite oxidoreductase, beta subunit [EC:1.7.5.1 1.7.99.-]  |
|                                  | 5                     | K02567 | 824                | Nitrate reductase (cytochrome) [EC:1.9.6.1]                                     |
|                                  | 6                     | K15878 | 207                | Rieske iron-sulfur protein                                                      |
|                                  | 7                     | K00372 | 941                | Assimilatory nitrate reductase catalytic subunit [EC:1.7.99.-]                  |
|                                  | 8                     | K15879 | 450                | Cytochrome b-561                                                                |
|                                  | 9                     | K02568 | 213                | Nitrate reductase (cytochrome), electron transfer subunit                       |
|                                  | 1                     | K04014 | 334                | Protein NrfC                                                                    |



|                      |   |        |     |                                                                   |
|----------------------|---|--------|-----|-------------------------------------------------------------------|
| Dissimilatory        | 2 | K03385 | 546 | Nitrite reductase (cytochrome c-552) [EC:1.7.2.2]                 |
| Nitrite To           | 3 | K04013 | 182 | Cytochrome c-type protein NrfB                                    |
| Ammonia              | 4 | K04015 | 383 | Protein NrfD                                                      |
| Nitrification        | 1 | K10945 | 413 | methane/ammonia monooxygenase subunit B                           |
|                      | 2 | K10944 | 247 | methane/ammonia monooxygenase subunit A [EC:1.14.18.3 1.14.99.39] |
|                      | 3 | K10535 | 505 | hydroxylamine dehydrogenase [EC:1.7.2.6]                          |
|                      | 4 | K10946 | 265 | methane/ammonia monooxygenase subunit C                           |
| Nitrogen<br>Fixation | 1 | K02591 | 458 | nitrogenase molybdenum-iron protein beta chain [EC:1.18.6.1]      |
|                      | 2 | K02595 | 124 | nitrogenase-stabilizing/protective protein                        |
|                      | 3 | K00531 | 117 | nitrogenase delta subunit [EC:1.18.6.1]                           |
|                      | 4 | K02588 | 293 | nitrogenase iron protein NifH                                     |
|                      | 5 | K02586 | 477 | nitrogenase molybdenum-iron protein alpha chain [EC:1.18.6.1]     |

<sup>a</sup> Nelson MB, Berlemont R, Martiny AC, Martiny JB. Nitrogen Cycling Potential of a Grassland Litter Microbial Community. *Appl Environ Microbiol.* 2015;81(20):7012-7022. doi:10.1128/AEM.02222-1.
